# Supplementary material for: The Arabidopsis TOR Kinase Specifically Regulates the Expression of Nuclear Genes Coding for Plastidic Ribosomal Proteins and the Phosphorylation of the Cytosolic Ribosomal Protein S6
Source: PubMed Central journal article supplement (PMC5100631; doi:10.3389/fpls.2016.01611), 2016-11-07
Supplement: Presentation_1.pdf [file Presentation_1.pdf]

## Supplementary Figure S1. Details of MEME analysis for Figure 4A.

\*\*\*\*\*

MEME - Motif discovery tool

\*\*\*\*\*

MEME version 4.11.2

For further information on how to interpret these results or to get a copy of the MEME software please access <http://meme-suite.org> .

Timothy L. Bailey and Charles Elkan,

TRAINING SET

\*\*\*\*\*

| Sequence name | Weight | Length | Sequence name | Weight | Length |
|---------------|--------|--------|---------------|--------|--------|
| AT1G05190     | 1.0000 | 92     | AT1G07320     | 1.0000 | 57     |
| AT1G16790     | 1.0000 | 85     | AT1G29070     | 1.0000 | 93     |
| AT1G32990     | 1.0000 | 42     | AT1G35680     | 1.0000 | 41     |
| AT1G48350     | 1.0000 | 65     | AT1G64510     | 1.0000 | 50     |
| AT1G68590     | 1.0000 | 63     | AT1G71720     | 1.0000 | 23     |
| AT1G74970     | 1.0000 | 100    | AT1G75350     | 1.0000 | 92     |
| AT1G78630     | 1.0000 | 41     | AT1G79850     | 1.0000 | 30     |
| AT2G24090     | 1.0000 | 74     | AT2G33450     | 1.0000 | 41     |
| AT2G33800     | 1.0000 | 78     | AT2G38140     | 1.0000 | 65     |
| AT2G43030     | 1.0000 | 62     | AT3G13120     | 1.0000 | 104    |
| AT3G15190     | 1.0000 | 75     | AT3G20230     | 1.0000 | 79     |
| AT3G23700     | 1.0000 | 46     | AT3G25920     | 1.0000 | 77     |
| AT3G27160     | 1.0000 | 55     | AT3G27830     | 1.0000 | 71     |
| AT3G27850     | 1.0000 | 66     | AT3G44890     | 1.0000 | 71     |
| AT3G52150     | 1.0000 | 50     | AT3G54210     | 1.0000 | 50     |
| AT3G56910     | 1.0000 | 99     | AT3G63190     | 1.0000 | 133    |
| AT3G63490     | 1.0000 | 66     | AT4G01310     | 1.0000 | 67     |
| AT4G17560     | 1.0000 | 64     | AT4G29060     | 1.0000 | 234    |
| AT4G34620     | 1.0000 | 79     | AT5G13510     | 1.0000 | 32     |
| AT5G13720     | 1.0000 | 177    | AT5G14320     | 1.0000 | 140    |
| AT5G15760     | 1.0000 | 47     | AT5G17870     | 1.0000 | 42     |
| AT5G24490     | 1.0000 | 89     | AT5G30510     | 1.0000 | 75     |
| AT5G40950     | 1.0000 | 84     | AT5G47190     | 1.0000 | 43     |
| AT5G54600     | 1.0000 | 68     | AT5G65220     | 1.0000 | 72     |

\*\*\*\*\*

\*\*\*\*\*

MOTIF 1 MEME width = 21 sites = 28 llr = 303 E-value = 6.5e-024

\*\*\*\*\*

Multilevel consensus TCTTCTTCTTCATCCTCATTT

Motif 1 sites sorted by position p-value

| Sequence name | Start | p-value  | Site                                          |
|---------------|-------|----------|-----------------------------------------------|
| AT3G27160     | 25    | 1.74e-10 | CAATTTCTCT TCTTCTTCTTCTTCTTCTCG CGACGCGTTA    |
| AT5G65220     | 43    | 4.28e-10 | AGAACTCTGC TCTTCTTCTTCTTCTTCCGCC ATAGCTACA    |
| AT5G14320     | 66    | 7.14e-10 | TCCGTTTCAGC TCATCTTCTTCTTCTTCTCG TCACCTCTGA   |
| AT1G07320     | 12    | 1.12e-08 | CTTTCTCAGT CTTTCTTCTTCTTCTTCTCGTG TGATAGGTCA  |
| AT4G34620     | 34    | 1.35e-07 | AAACCTTAC TTATCTTCTTCTTCTTCTCACTT CTCAGACCTC  |
| AT3G63490     | 22    | 1.55e-07 | AGACTCGCAC TCTTCTTCTTCTTCTTGTAC CCAGAAAGAA    |
| AT1G75350     | 3     | 2.95e-07 | CT TCATCATCCTCATTCTCTTAT CCATCAATCG           |
| AT1G74970     | 17    | 4.25e-07 | ACTCTGCTCG TTATCTTCTTCTTCTTCTTACCT GTTCAACGAA |
| AT1G05190     | 34    | 5.38e-07 | AACGCTCTT TCTTCTTCTTCTTCTTCTTCTT TGGAGCAGAG   |
| AT3G25920     | 22    | 1.61e-06 | CTCTCTCTAT CTATCTTCTTCAACCTTATCC TTGAAGCTTT   |
| AT2G33800     | 26    | 1.78e-06 | GCTGGATAAG CCTTTTGCTTCTTCTTCACTT CCTTCTCAT    |
| AT2G24090     | 8     | 1.78e-06 | ATCTTCT TCATCATCTTCTTCTTCAATC GGAGTGAGCG      |

|           |     |          |            |                       |            |
|-----------|-----|----------|------------|-----------------------|------------|
| AT3G63190 | 44  | 2.40e-06 | AACAATTCGG | TCTGCTTCGTCTCCCTCCCTT | TCAATTTTCG |
| AT2G38140 | 16  | 2.40e-06 | CACTGCCTTA | TCTTCTTCTGGATCTTCTTCT | TCCAACAAAT |
| AT5G40950 | 11  | 4.64e-06 | AAGGAGAAGA | ACTTCTTCTTCAACCTCAGAA | AACCCTAATT |
| AT3G52150 | 14  | 7.85e-06 | GACACTCGCA | ACTTCTTCTTATCGACACCT  | ACACTCTCCT |
| AT1G68590 | 6   | 8.54e-06 | TGACC      | ATATCTTCTTATCCATATTC  | TCACAAAATC |
| AT3G23700 | 2   | 1.09e-05 | A          | TCATTACCTTCAATCTCCGTG | GCTTTTTCG  |
| AT4G29060 | 9   | 1.39e-05 | GAAGACTC   | TTATCTCCTCTATCCACCAAG | AGAGGGAAAA |
| AT1G64510 | 15  | 1.75e-05 | AAATTTTACT | CTCTCATCTCCTCTTTGCTTT | CACAATCTCA |
| AT2G43030 | 35  | 1.89e-05 | CTCTCTCAGA | GTTTCTTCTCCTCTGTGAATC | TCCGACA    |
| AT5G13720 | 117 | 2.19e-05 | ACGCGCCGAT | CTTCTTCTACTACTTGTCTT  | CCGGCAATAA |
| AT5G47190 | 3   | 2.36e-05 | AA         | GGCTCTTCTTACTCTGGTTT  | CGAGTTGGG  |
| AT3G20230 | 49  | 4.72e-05 | ACTCCGAGAG | CTTCTTCTCTACTCTTCAAG  | CTCGACGAAG |
| AT1G32990 | 17  | 4.72e-05 | TAGCTTTCAC | TAACCTTCTTCTTTCACAGTG | AATCA      |
| AT5G13510 | 5   | 5.37e-05 | AGAA       | ACAGTCTCCTCATCTTCTGAG | CAAAAAA    |
| AT4G17560 | 20  | 8.30e-05 | CTTTTCCACT | GTCTTCCCTCCATTTTCTCCG | AGTAACTGAG |
| AT5G24490 | 6   | 9.90e-05 | TATTT      | TCCACTTCTTCTACTACT    | TCAGTCTTCA |

\*\*\*\*\*  
 MOTIF 2 MEME width = 21 sites = 12 llr = 190 E-value = 2.1e-011  
 \*\*\*\*\*

-----  
 Motif 2 Description  
 -----

Multilevel consensus GAGGGAAAAAGAAGAAGAGAG

Motif 2 sites sorted by position p-value  
 -----

| Sequence name | Start | p-value  | Site                                        |
|---------------|-------|----------|---------------------------------------------|
| AT3G27850     | 37    | 1.64e-11 | CCAAAGCTTC AGAGGAAGAAGAAGAAGAGAG TGAGAAACA  |
| AT5G54600     | 27    | 1.93e-11 | CGGATAGGAC GAAGGAAAAAGAAGAAGAGTG AAAGTTGCAG |
| AT3G15190     | 31    | 7.67e-10 | TACTAACAGA GGGAGAAAGAGCAGAGAAGAG AGAAGAGGAA |
| AT1G75350     | 57    | 8.70e-10 | TCTCTATCAC CAGGAAAAAGAAGAAGATAG CTCTGAAGA   |
| AT3G13120     | 57    | 5.05e-09 | TCGAACGTTA AGAGGAAGAAGAATAAGAGAA ATCGATTCTG |
| AT1G48350     | 44    | 2.31e-08 | GAGAGCGAGC CAGAGAGAGTGAGTAAGAGAG A          |
| AT1G78630     | 11    | 5.37e-08 | GGAAGAGCA GAAGAAATTTGCAGAAGAGAG AAAAAACAAA  |
| AT5G14320     | 13    | 2.04e-07 | AAGTAGAGAC GGAGCAAAAACAAGAGAAGCG TTTGGATTCC |
| AT3G27830     | 43    | 2.34e-07 | AAGAAAAACT CAGAAGAAAAGCCAAAGAGTG AAACAAA    |
| AT4G29060     | 57    | 2.85e-07 | AAAATAGCAC AGGGGAGAGACAAAATGAGAT AAGGATTTGA |
| AT3G56910     | 28    | 3.24e-07 | GACACAGACA GAGAGAAGGAGAAAAAGCTTA TCCACTATCA |
| AT1G71720     | 3     | 3.24e-07 | CG CGGCGGATAAGAGGAAAAAAG                    |

-----

-2.5 -2.0 -1.5 -1.0 -0.5 0.0 0.5 1.0 1.5 2.0 2.5  
log<sub>2</sub> (ratio)

# Sup Figure S2

**A**

| Experiment |       | Control |       |
|------------|-------|---------|-------|
| Genot.     | Sugar | Genot.  | Sugar |
| Col-0      | +     | Col-0   | -     |
| RNAi       | +     | RNAi    | -     |
| RNAi       | -     | Col-0   | -     |
| RNAi       | +     | Col-0   | +     |

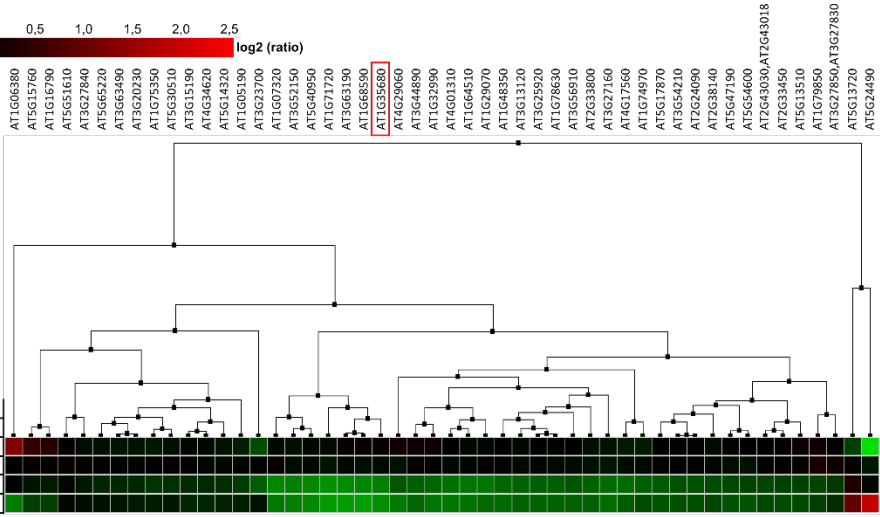

**B**

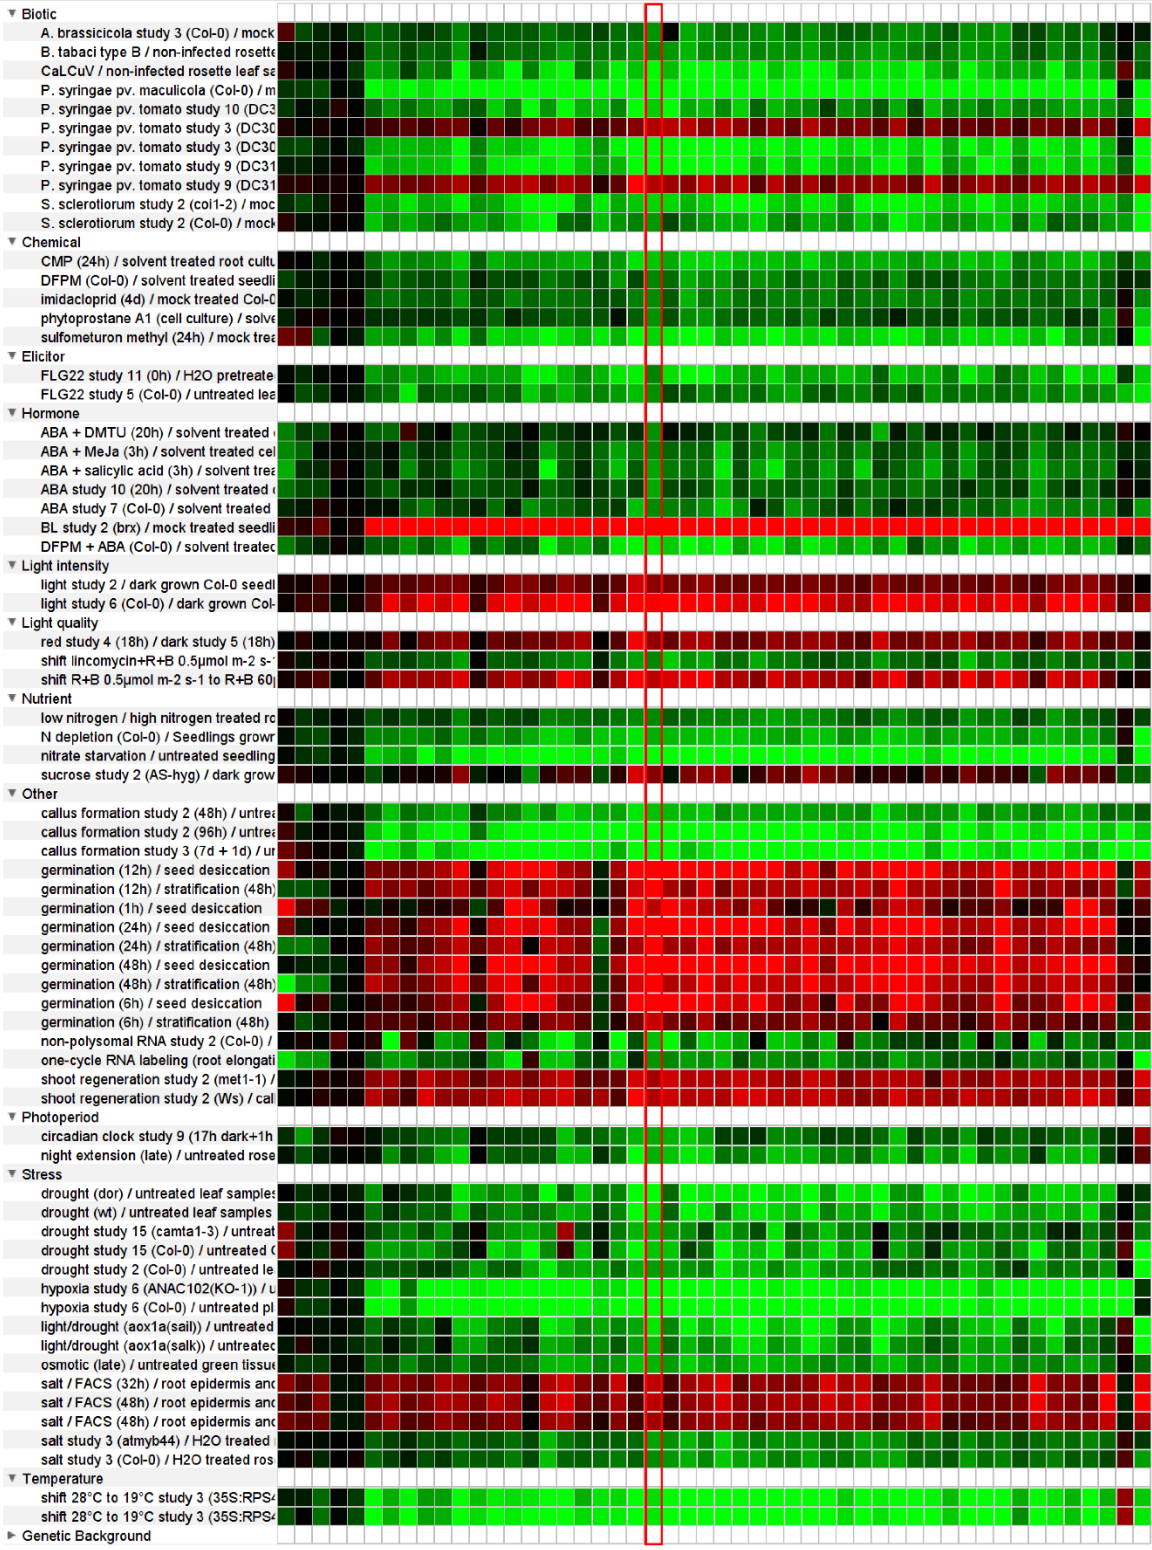

**Supplementary Fig. S2: Expression profile of the chloroplastic ribosomal genes encoded by the nuclear genome.** (A) Expression profile in the experiment AT-00696 (Genevestigator nomenclature, Xiong *et al.*, 2013) in which seeds of an estradiol inducible TOR RNAi line or Col-0 wild-type were germinated on estradiol-containing medium (without any sugar) and, after 3 days of growth, supplemented or not with 15mM glucose, (B) Expression profile of these genes in the "perturbations" sub-group of the Genevestigator database. Experiments are grouped according to the type of treatment used. Only experiments in which the At1g35680 gene showed an absolute logarithmic fold change of 2.5 were kept.

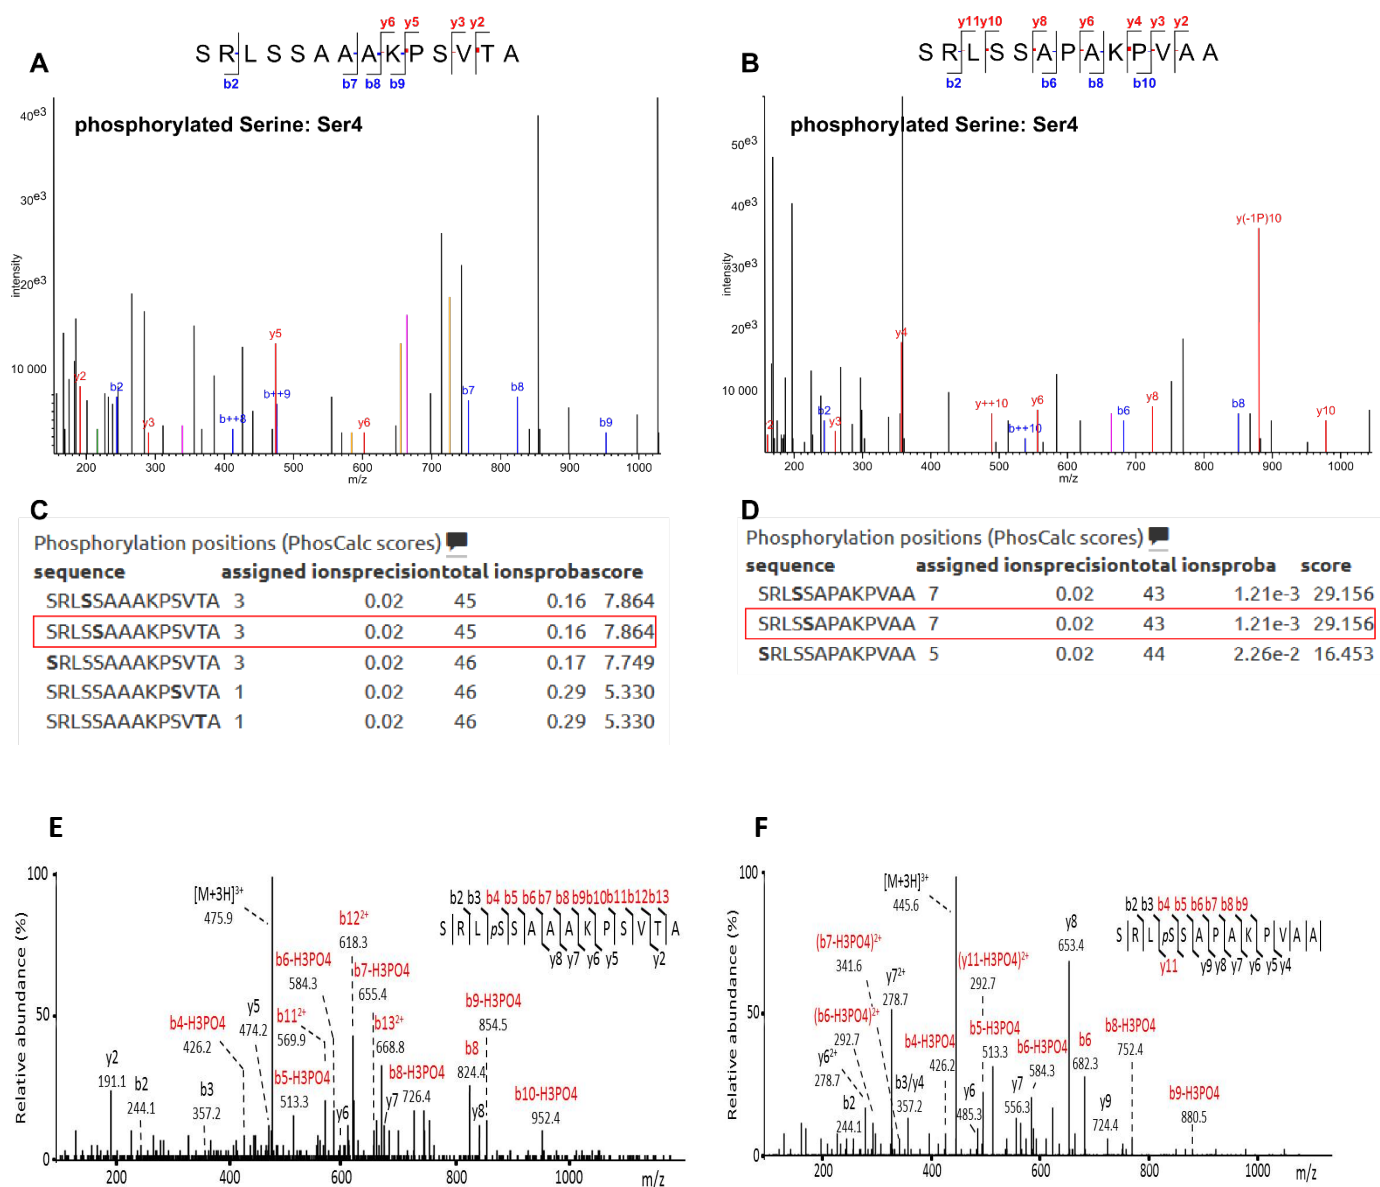

### Supplementary Fig. S3: Statistical analysis of the phosphorylation positions in the C-terminal peptides of the RPS6 proteins.

(A) and (B), Spectra of phosphorylated peptides of RPS6A and RPS6B (respectively) are displayed with the corresponding sequence with the b ions (from the N-terminal extremity) and the y ions (from the C-terminal extremity). The position of the phosphorylation predicted by the X!Tandem software is indicated. "-1P" represents the neutral loss of a phosphate group. "b++" and "y++" ions represent the shift due to the phosphorylation. Parental ion fragments are: SRLpSSAAAKPSVTA ( $m/z=713,3587$ ,  $z=2$ ) and SRLpSSAPAKPVAA ( $m/z=667,8453$ ,  $z=2$ ) and were identified in 2 and 5 samples respectively. (C) and (D), PhosCalc analysis of spectra displayed in A and B, respectively, showing the statistical analysis of the phosphorylation sites predictions. (E) and (F), Spectra of phosphorylated peptides of RPS6A and RPS6B (respectively) obtained after IMAC purification of phosphorylated peptides from auxin-treated plants. Peptides are displayed with the corresponding sequence with the b ions (from the N-terminal extremity) and the y ions (from the C-terminal extremity).

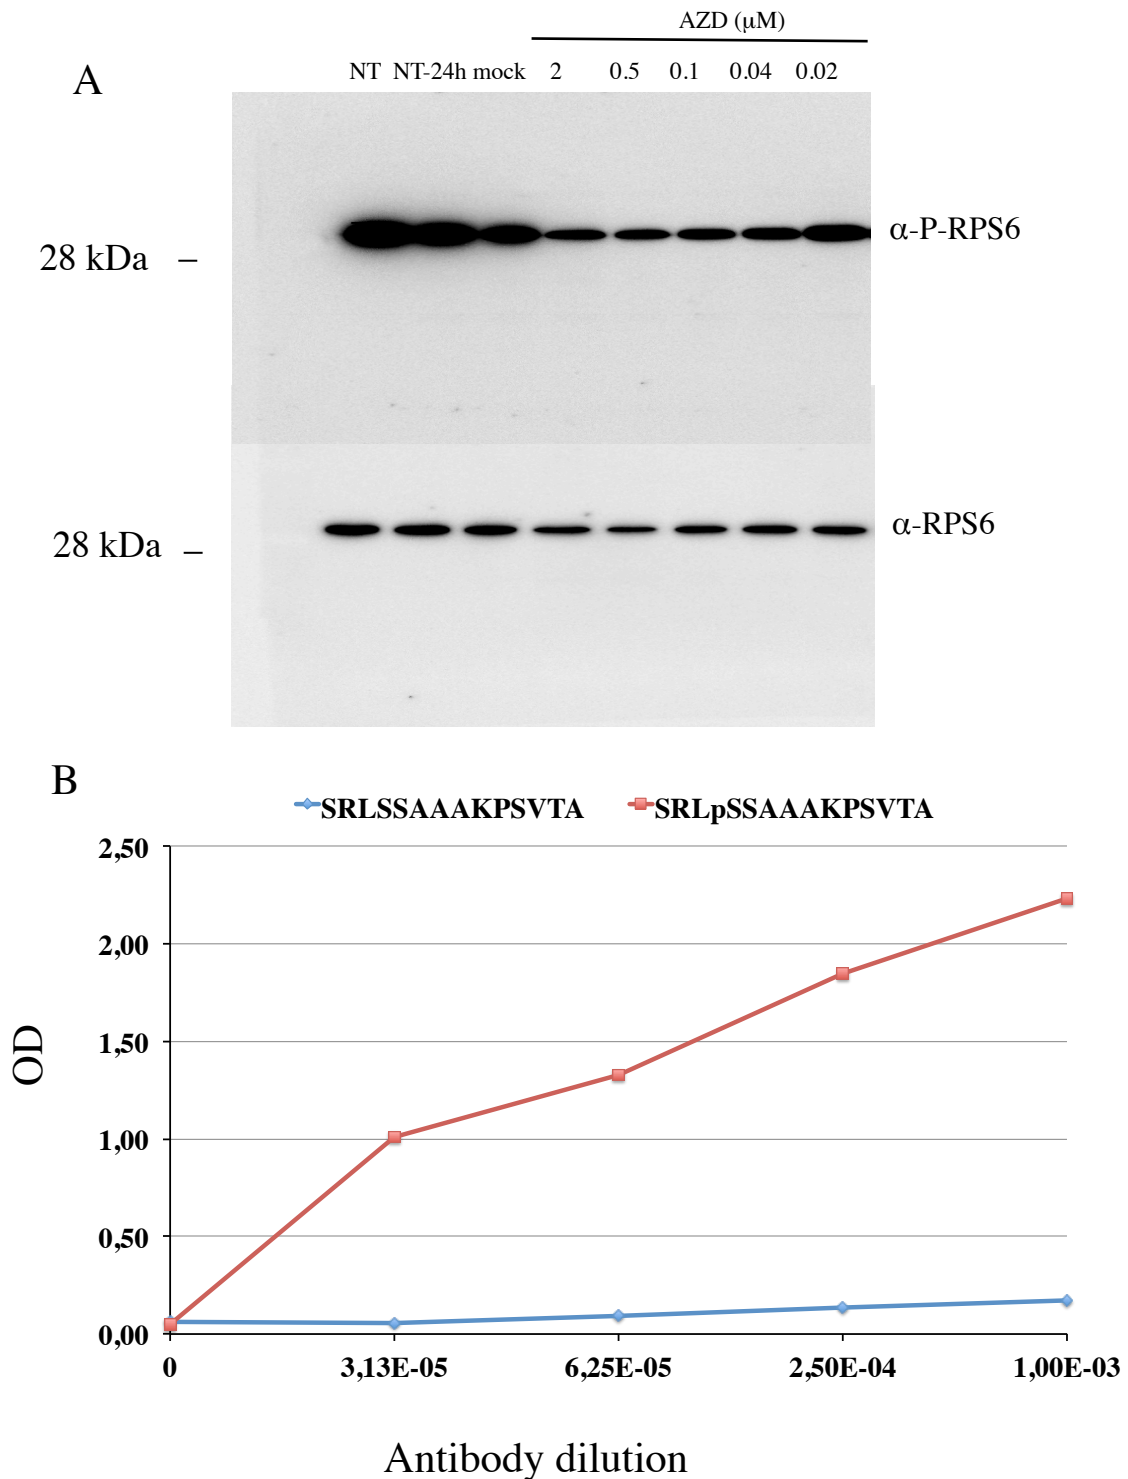

**Supplementary Fig. S4: Western blot analysis of RPS6 phosphorylation.**

(A), Image of the whole Western blot membrane showing the specificity of the RPS6 antibodies. Total protein extracts obtained from seedlings were separated by SDS-PAGE and blotted onto a membrane. After incubation with the phosphospecific antibody against RPS6 Ser240 (P-RPS6) or a monoclonal antibody against total animal RPS6 (RPS6), blots were revealed by a secondary antibody linked to HRP activity and imaged with a CCD camera (see Material and Methods for details).

Samples are in the same order as in Fig. 7A with a longer exposure time.

(B), ELISA test with the phosphospecific antibody against RPS6 Ser240. The phosphopeptide used for antibody production and the corresponding non-phosphorylated peptide were coated on microtitration plates. The anti-phosphopeptide crude serum was enriched on the immobilized RPS6 phosphopeptide to obtain phospho-specific antibodies which were used as primary antibodies in the ELISA test after sequential dilutions to evaluate their specificity.

OD after revelation by a secondary antibody coupled

**Supplementary Table S1.** Gene accessions numbers and quantitative values corresponding to Figure 3. Log<sub>2</sub> ratios for transcriptomic (two first columns RNAi1 and RNAi2) and translatic (second columns RNAi1 and RNAi2) experiments and peak areas in arbitrary units for proteomic analyses (Exp1 and Exp2) are shown.

| AGI       | RNAi1 | RNAi2 | RNAi1 | RNAi2 | Exp1 | Exp2 |
|-----------|-------|-------|-------|-------|------|------|
| AT1G05190 | -0,69 | -0,62 | -0,36 | -0,45 | 0,21 | 0,50 |
| AT1G06380 | 0,47  |       | 0,39  | 0,33  |      |      |
| AT1G07320 |       |       |       |       | 0,60 |      |
| AT1G16790 | -0,38 | -0,51 | -0,46 | -0,58 |      |      |
| AT1G29070 | 0,36  | 0,36  | 0,78  | 0,47  |      |      |
| AT1G32990 | -0,58 | -0,44 | -0,40 |       | 0,50 | 0,67 |
| AT1G35680 |       |       |       |       | 0,17 |      |
| AT1G35680 |       |       |       |       | 0,17 |      |
| AT1G48350 | -0,33 |       |       | -0,34 | 0,50 |      |
| AT1G64510 |       |       |       |       |      |      |
| AT1G68590 | -0,45 | -0,39 |       |       |      |      |
| AT1G71720 | -0,38 |       |       |       |      |      |
| AT1G74970 | -0,45 | -0,31 | -0,53 | -0,53 |      | 0,83 |
| AT1G75350 | -0,35 | -0,40 | -0,33 | -0,38 | 0,50 | 0,83 |
| AT1G78630 | -0,55 | -0,55 | -0,32 |       | 0,60 | 0,83 |
| AT1G79850 | -0,35 | -0,30 |       | -0,35 | 1,50 | 0,67 |
| AT2G24090 |       |       |       |       |      |      |
| AT2G33450 | -0,61 | -0,36 |       |       |      |      |
| AT2G33450 |       |       |       |       |      |      |
| AT2G33800 | -0,39 | -0,44 | -0,36 | -0,53 | 0,64 |      |
| AT2G38140 | -0,52 | -0,35 |       |       |      |      |
| AT2G43030 |       |       | -0,53 | -0,56 | 0,50 | 1,13 |
| AT3G13120 |       |       |       |       |      |      |
| AT3G15190 | -0,44 | -0,41 |       | -0,30 | 0,17 | 0,50 |
| AT3G15190 |       |       |       | -0,30 | 0,17 | 0,50 |
| AT3G20230 |       |       |       |       |      |      |
| AT3G20230 |       |       |       |       |      |      |
| AT3G23700 | -0,67 | -0,57 |       | -0,35 |      |      |
| AT3G25920 | -0,44 | -0,38 |       |       | 0,54 | 0,56 |
| AT3G27160 | -0,44 | -0,48 |       |       |      |      |
| AT3G27830 |       |       |       |       | 0,83 | 0,50 |
| AT3G27840 |       |       |       |       |      |      |
| AT3G27850 | -0,36 |       |       |       |      |      |
| AT3G44890 | -0,43 | -0,32 |       |       | 0,50 | 0,33 |
| AT3G52150 |       | -0,36 |       |       |      |      |
| AT3G54210 |       |       |       |       |      |      |
| AT3G56910 |       |       |       |       |      |      |
| AT3G63190 | -0,47 |       |       | 0,35  |      |      |
| AT3G63490 |       |       |       |       | 0,38 | 0,58 |
| AT3G63490 |       |       |       |       | 0,38 | 0,58 |
| AT3G63490 |       | -0,37 |       |       | 0,38 | 0,58 |
| AT4G01310 | -0,37 |       |       |       | 0,50 | 1,10 |
| AT4G17560 |       | -0,49 |       | -0,54 |      |      |
| AT4G29060 | -0,56 | -0,36 |       |       |      |      |
| AT4G34620 | -0,31 | -0,32 |       | -0,54 | 0,33 |      |
| AT5G13510 | -0,36 | -0,38 |       |       | 0,36 | 0,17 |
| AT5G13510 | -0,35 | -0,34 |       | -0,31 | 0,36 | 0,17 |
| AT5G13720 | 0,56  | 0,49  | 0,91  | 0,84  |      |      |
| AT5G13720 |       | 0,35  | 0,55  | 0,55  |      |      |
| AT5G14320 |       | -0,38 |       |       | 0,50 | 0,75 |
| AT5G15760 |       |       |       |       |      |      |
| AT5G17870 | -0,30 |       | -0,43 | -0,80 |      |      |
| AT5G24490 | -0,38 | -0,69 |       |       |      |      |
| AT5G24490 | -0,44 | -0,65 | -0,39 |       |      |      |
| AT5G30510 | -0,31 |       |       |       | 0,54 | 1,17 |
| AT5G40950 |       |       |       |       | 0,50 |      |
| AT5G47190 | -0,49 | -0,58 |       | -0,37 | 0,20 |      |
| AT5G51610 |       |       |       |       |      |      |
| AT5G54600 |       |       |       |       | 0,36 | 0,33 |
| AT5G63300 |       |       |       |       |      |      |
| AT5G65220 |       |       |       |       | 0,38 | 0,50 |

**Supplementary Table S2:** TOR inactivation affects the ribosomal protein peptides accumulation.

Effect of TOR inactivation on the peptide quantities evaluated by the fold-change calculation (Log<sub>2</sub>(ratio)). Only the peptides found as significantly differently accumulated by Student *t*-test (\*: p-value<0,05, \*\*: p-value<0,01, \*\*\*: p-value<0,001) are shown. Negative values correspond to peptides that are down-regulated during TOR inactivation.

oxM : oxidized methionines.

| Peptide sequence     | Proteins                             | RP families | Protein paralogs |   |   | Log <sub>2</sub> (ratio) |          |
|----------------------|--------------------------------------|-------------|------------------|---|---|--------------------------|----------|
|                      |                                      |             | A                | B | C | D                        |          |
| TEKDVTPOxMGGFPHYGIVK | At1g43170                            | L3          | X                |   |   |                          | -0,757*  |
| IINSDEIQSVVNPIKK     | At3g09630                            | L4          | X                |   |   |                          | -0,419** |
| GVEAESIEEoxMYKK      | At5g39740                            | L5          |                  | X |   |                          | -0,599*  |
| NYIYGGHVSNYoxMK      | At3g25520,<br>At5g39740              |             | X                | X |   |                          | -0,583*  |
| FDDKYFGK             | At1g18540,<br>At1g74050<br>At1g74060 | L6          | X                | X | X |                          | -0,320*  |
| TEGEFFAEKKEEK        | At1g18540,<br>At1g74050<br>At1g74060 |             | X                | X | X |                          | -0,497*  |
| ANFNDKYEEYR          | At2g47610,<br>At3g62870              | L7a         | X                | X |   |                          | -0,564*  |
| LKVPPALNQFTK         | At2g47610,<br>At3g62870              |             | X                | X |   |                          | -0,512*  |
| KoxMEVPYCIK          | At2g47610,<br>At3g62870              |             | X                | X |   |                          | -0,738*  |
| VPPALNQFTK           | At2g47610,<br>At3g62870              |             | X                | X |   |                          | -0,350*  |
| KVEoxMLDGVITIVR      | At1g33120,<br>at1g33140              | L9          |                  | X | X |                          | -0,862*  |
| VHPFHVLR             | At1g14320,<br>At1g26910<br>At1g66580 | L10         | X                | X | X |                          | -0,581*  |
| ICoxMLGDAQHVVEAEK    | At1g08360,<br>At2g27530<br>At5g22440 | L10a        | X                | X | X |                          | -0,473*  |
| KYHAFLASESVIK        | At1g08360                            |             | X                |   |   |                          | -0,604*  |
| LAPTIGISVDHR         | At5g23900                            | L13         |                  |   |   | X                        | -0,403*  |
| PTSGPLRPVHVGQTLK     | At3g49010,<br>At5g23900              |             |                  | X |   | X                        | -0,639** |
| YYEILVDPAHNAVR       | At4g16720,<br>At4g17390              | L15         | X                | X |   |                          | -0,538*  |
| GIVYGKPTNQGVTLK      | At4g16720,<br>At4g17390              |             | X                | X |   |                          | -0,836*  |
| LVEFoxMTGKDDK        | At5g27850                            | L18         |                  |   | X |                          | -0,650*  |
| YPLTTESAoxMKK        | At2g39460,<br>At3g55280              | L23a        | X                | X |   |                          | -0,638*  |
| TPLPDVVIHAPK         | At2g31610                            | S3          | X                |   |   |                          | -0,493*  |
| DGYMVSSGQPTK         | At3g53870,<br>At5g35530<br>At2g31610 |             | X                | X | X |                          | 1,5979*  |
| LoxMEVHGDYTAEDVGK    | At4g34670                            | S3a         |                  | X |   |                          | -0,546*  |
| YPDPLIKPNDTIK        | At2g17360,                           | S4          | X                | X |   | X                        | -0,227*  |



|                   |                         |      |   |   |   |  |           |
|-------------------|-------------------------|------|---|---|---|--|-----------|
|                   | At5g07090<br>At5g58420  |      |   |   |   |  |           |
| GVSDLPGLTDTEKPR   | At5g10360               | S6   |   | X |   |  | -0,387*   |
| KGVSDLPGLTDTEKPR  | At5g10360               |      |   | X |   |  | -0,736*   |
| KGENDLPGLTDTEKPR  | At4g31700               |      | X |   |   |  | -0,552*   |
| HIDFALTSPFGGGRPGR | At5g15200               | S9   |   | X |   |  | -0,917*   |
| QLVNIPSEFMVR      | At5g15200,<br>At5g39850 |      | X | X |   |  | -0,257*   |
| IQDKEGIPPDQQR     | At2g47110,<br>At3g62550 | S27a |   | X | X |  | -2,175*** |

**Supplementary Table S3:** Analyses of RPS6 phosphorylated peptides in extracts from *Arabidopsis* plants treated by auxin.

| Accession number | RPS6 isoform | Range     | Sequence           | Metascore | Error, ppm | Phospho site             |
|------------------|--------------|-----------|--------------------|-----------|------------|--------------------------|
| AT4G31700.1      | S6a          | 237 - 250 | R.SRLSSAAAKPSVTA.- | 54.1      | -4.80      | Ser237 and Ser240        |
| AT4G31700.1      | S6a          | 237 - 250 | R.SRLSSAAAKPSVTA.- | 49.8      | -0.08      | Ser240                   |
| AT4G31700.1      | S6a          | 237 - 250 | R.SRLSSAAAKPSVTA.- | 44.2      | -1.15      | Ser240                   |
| AT4G31700.1      | S6a          | 237 - 250 | R.SRLSSAAAKPSVTA.- | 59.9      | 8.25       | Ser240                   |
| AT4G31700.1      | S6a          | 237 - 250 | R.SRLSSAAAKPSVTA.- | 41        | 0.79       | Ser237, Ser240 or Ser241 |
| AT5G10360.1      | S6b          | 228 - 236 | R.RSESLAKKR.S      | 47.2      | -3.62      | Ser231                   |
| AT5G10360.1      | S6b          | 237 - 249 | R.SRLSSAPAKPVAA.-  | 46.4      | -2.94      | Ser240                   |
| AT5G10360.1      | S6b          | 237 - 249 | R.SRLSSAPAKPVAA.-  | 63.8      | -5.41      | Ser240                   |
| AT5G10360.1      | S6b          | 237 - 249 | R.SRLSSAPAKPVAA.-  | 46.5      | -0.83      | Ser240 or Ser241         |
